# Supplementary material for: Clove Essential Oil and Its Main Constituent, Eugenol, as Potential Natural Antifungals against Candida spp. Alone or in Combination with Other Antimycotics Due to Synergistic Interactions
Source: MDPI journal article supplement (doi:10.3390/molecules28010215), 2022-12-26
Supplement: s1 [file s1]

SUPPLEMENTARY FILE

a)

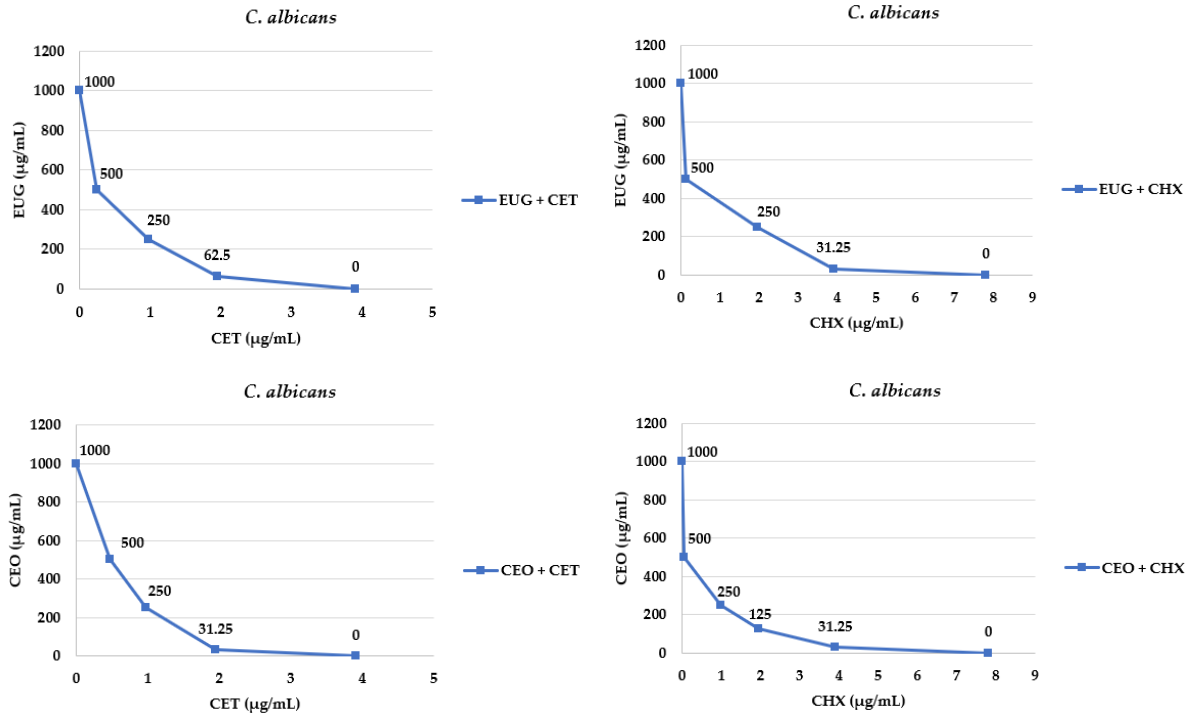

b)

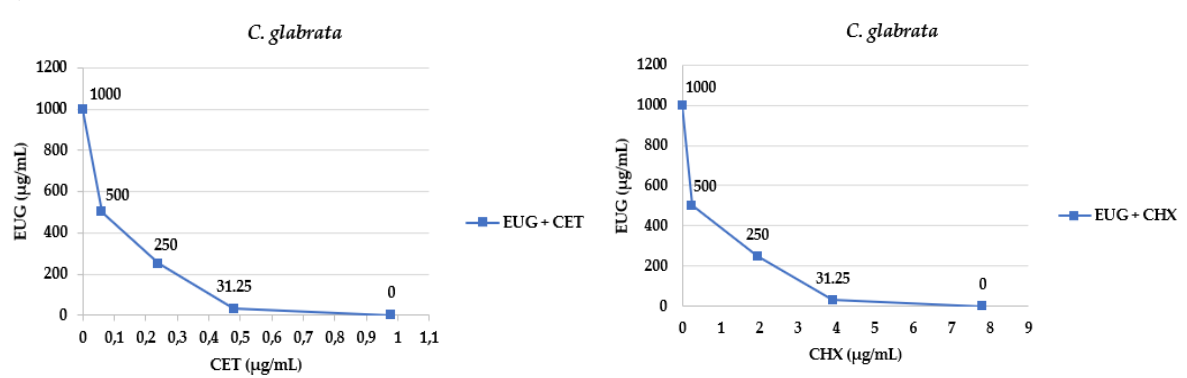

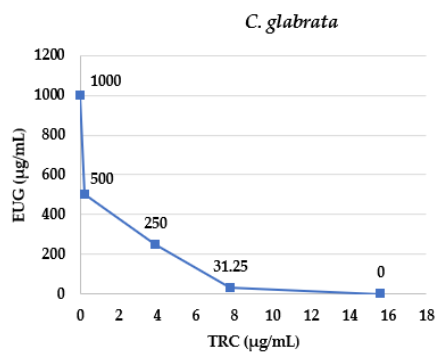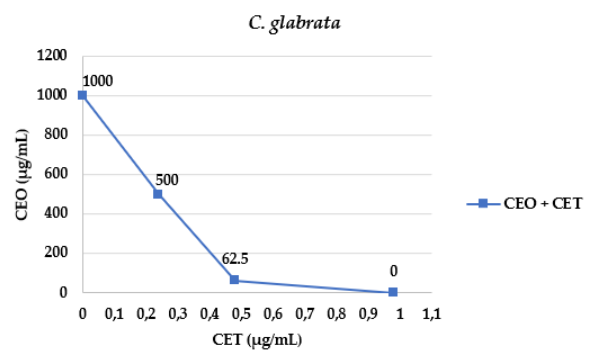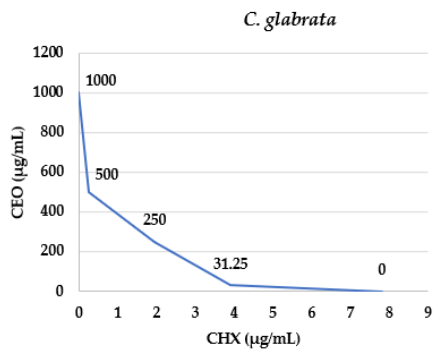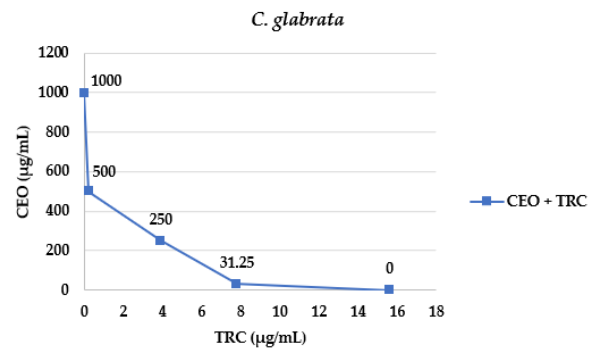

c)

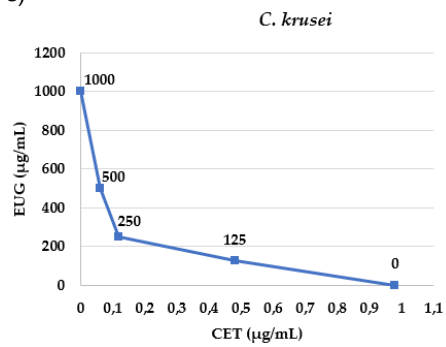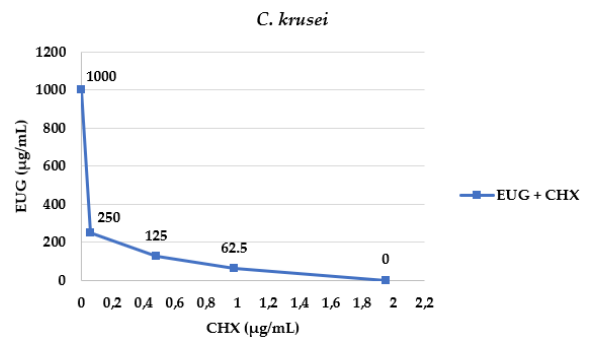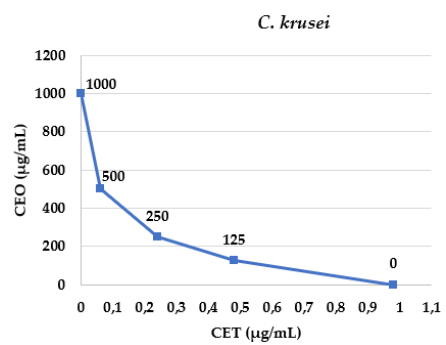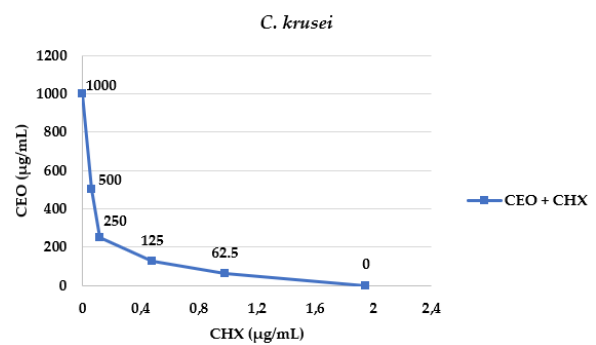

d)

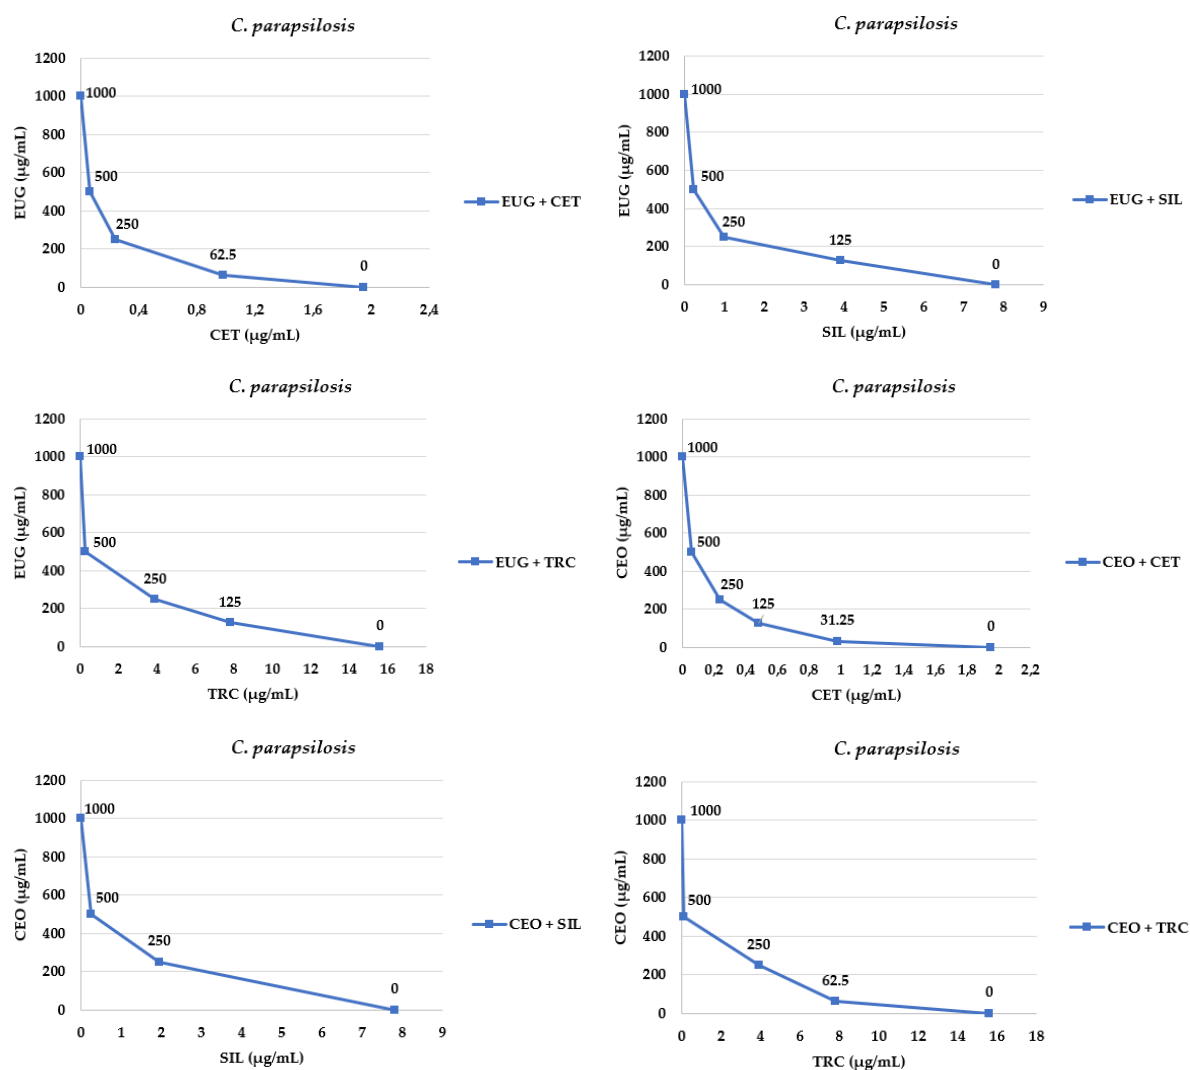

**Figure S1.** Isobolograms of FIC indexes indicating the synergy of CEO and EUG with selected substances for reference strains of *Candida*: a) *C. albicans* ATCC 10231, b) *C. glabrata* ATCC 90030, c) *C. krusei* ATCC 14243, d) *C. parapsilosis* ATCC 22019; EUG – eugenol, CEO – clove essential oil, CET – cetylpyridinium chloride, CHX – chlorhexidine, TRC – triclosan, SIL – silver nitrate;
